# Supplementary material
Source: PubMed Central journal article supplement (PMC9040344)
Supplement: 12877_2022_3070_MOESM1_ESM.pdf [file 12877_2022_3070_MOESM1_ESM.pdf]

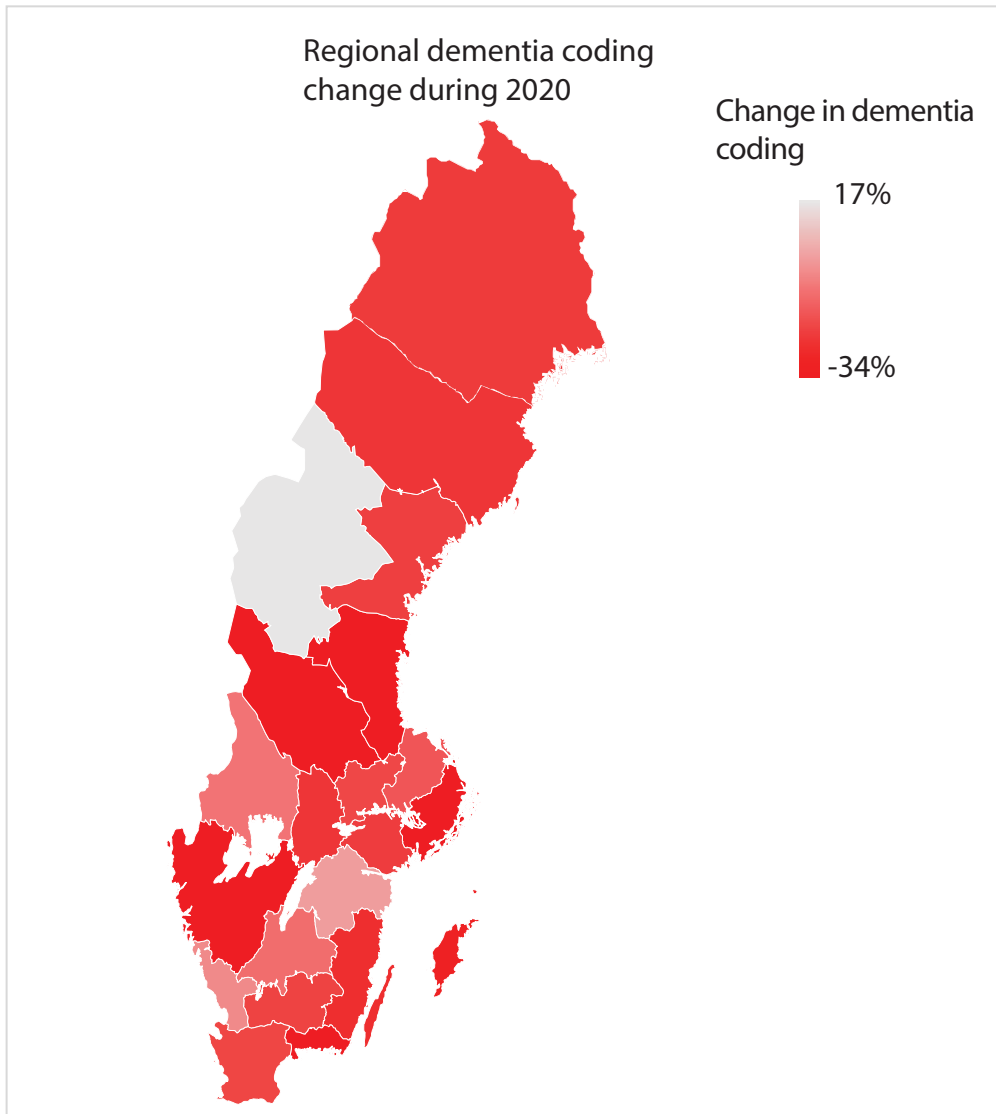

**Supplementary figure 1:** Regional dementia coding in Sweden during 2020 compared to expected value. The largest decreases in the number of dementia diagnoses could be found in densely populated urban areas and northern rural areas.
